# Supplementary material
Source: PubMed Central journal article supplement (PMC3190174)
Supplement: hhe0071-0246-s02.pdf [file hhe0071-0246-s02.pdf]

| Model                                              | rs749292   |            |             | rs727479   |            |             |
|----------------------------------------------------|------------|------------|-------------|------------|------------|-------------|
|                                                    | strata=age | strata=BMI | strata=race | strata=age | strata=BMI | strata=race |
| <b>Case-Control-Level Assumption</b> [ $H = L$ ]   |            |            |             |            |            |             |
| Additive                                           | 41.5       | 33.7       | 37.7        | 11.3       | 7.8        | 11.2        |
| Multiplicative                                     | 40.8       | 36.3       | 38.9        | 11.3       | 10.9       | 11.6        |
| Logistic                                           | 41.3       | 35.1       | 38.5        | 11.3       | 8.8        | 11.5        |
| Dominant                                           | 34.3       | 28.6       | 30.4        | 5.9        | 4.1        | 4.7         |
| Recessive                                          | 21.0       | 16.3       | 19.7        | 8.9        | 6.1        | 9.7         |
| Heterozygous                                       | 2.7        | 2.6        | 2.0         | 2.2        | 1.5        | 3.3         |
| <b>Population-Level Assumption</b> [ $H = J_\pi$ ] |            |            |             |            |            |             |
| Additive                                           | 42.2       | 27.3       | 33.4        | 11.4       | 4.3        | 10.1        |
| Multiplicative                                     | 41.3       | 35.2       | 38.5        | 11.3       | 8.8        | 11.5        |
| Logistic                                           | 41.3       | 35.1       | 38.5        | 11.3       | 8.8        | 11.5        |
| Dominant                                           | 35.1       | 23.3       | 26.0        | 5.9        | 1.9        | 4.1         |
| Recessive                                          | 21.2       | 13.0       | 18.4        | 9.0        | 3.7        | 8.7         |
| Heterozygous                                       | 2.9        | 2.3        | 1.3         | 2.2        | 1.2        | 3.1         |

Supplementary Table 1: Stratified trend test statistics using data on endometrial cancer risk and two estrogen-related variants in *CYP19A1*. Tests are stratified by age, body mass index (BMI), or race/ethnicity. The statistics using the population-level assumption were calculated with an assumed sampling fraction  $\pi=100$ ; statistics were nearly equivalent to those using  $\pi=1000$  (data not shown).

| Stratified | High-risk Allele Freq.          | Disease Freq. in Low-risk Homozygotes | $\Delta$ -GWA | $\Delta$ -CG | Label                                                |
|------------|---------------------------------|---------------------------------------|---------------|--------------|------------------------------------------------------|
| no         | 0.5                             | 0.45                                  | 0.05          | 0.10         | unstrat, mid allele, mid disease, small eff          |
| no         | 0.1                             | 0.45                                  | 0.05          | 0.10         | unstrat, low allele, mid disease, small eff          |
| no         | 0.1                             | 0.1                                   | 0.05          | 0.075        | unstrat, low allele, low disease, small eff          |
| no         | 0.5                             | 0.1                                   | 0.05          | 0.075        | unstrat, mid allele, low disease, small eff          |
| no         | 0.5                             | 0.45                                  | 0.10          |              | unstrat, mid allele, mid disease, mid eff            |
| yes        | (0.5,0.5,0.5,0.5,0.5)           | (0.01,0.025,0.0375,0.0625,0.075,0.1)  | 0.01          | 0.01         | strat, constant mid allele, low disease, small eff   |
| yes        | (0.5,0.5,0.5,0.5,0.5)           | (0.125,0.25,0.375,0.625,0.75,0.875)   | 0.05          | 0.05         | strat, constant mid allele, mid disease, small eff   |
| yes        | (0.5,0.5,0.5,0.5,0.5)           | (0.25,0.375,0.5,0.75,0.875,0.95)      | 0.05          | 0.05         | strat, constant mid allele, high disease, small eff  |
| yes        | (0.03,0.08,0.13,0.29,0.40,0.65) | (0.01,0.025,0.0375,0.0625,0.075,0.1)  | 0.01          | 0.03         | strat, variable low allele, low disease, small eff   |
| yes        | (0.03,0.08,0.13,0.29,0.40,0.65) | (0.125,0.25,0.375,0.625,0.75,0.875)   | 0.05          | 0.075        | strat, variable low allele, mid disease, small eff   |
| yes        | (0.03,0.08,0.13,0.29,0.40,0.65) | (0.25,0.375,0.5,0.75,0.875,0.95)      | 0.05          | 0.075        | strat, variable low allele, high disease, small eff  |
| yes        | (0.24,0.46,0.59,0.79,0.86,0.95) | (0.01,0.025,0.0375,0.0625,0.075,0.1)  | 0.01          | 0.01         | strat, variable high allele, low disease, small eff  |
| yes        | (0.24,0.46,0.59,0.79,0.86,0.95) | (0.125,0.25,0.375,0.625,0.75,0.875)   | 0.05          | 0.075        | strat, variable high allele, mid disease, small eff  |
| yes        | (0.24,0.46,0.59,0.79,0.86,0.95) | (0.25,0.375,0.5,0.75,0.875,0.95)      | 0.05          | 0.075        | strat, variable high allele, high disease, small eff |

Supplementary Table 2: Scenarios in which finite-sample power was investigated via simulations. Different effect sizes  $\Delta$  were used in candidate-gene (CG) versus genome-wide association (GWA) simulations.  $\Delta$  is the additive difference in disease probability between the low-risk and high-risk homozygotes when H is the identity function, i.e. for additive, dominant, recessive, and heterozygous truths. For multiplicative/logistic truths,  $\Delta$  is the additive difference between logarithms/logits of disease probabilities in the low-risk and high-risk homozygotes for unstratified analyses. For stratified analyses with multiplicative/logistic truths,  $\Delta$  is used to calculate a difference between logarithms/logits in the low-risk and high-risk homozygotes in each stratum. Then the median of these differences is used as a constant difference across strata in performing the simulations. If this choice causes a multiplicative probability to be greater than 1, then the difference between the logarithms of the highest probability in low-risk homozygotes and 0.99 is used instead.

| Scenario                  | Stat   | Additive Truth |      |      | Multiplicative Truth |      |      | Logistic Truth |      |      | Dominant Truth |      |      | Recessive Truth |      |      | Heterozygous Truth |      |      |
|---------------------------|--------|----------------|------|------|----------------------|------|------|----------------|------|------|----------------|------|------|-----------------|------|------|--------------------|------|------|
|                           |        | N              | RE   | ARE  | N                    | RE   | ARE  | N              | RE   | ARE  | N              | RE   | ARE  | N               | RE   | ARE  | N                  | RE   | ARE  |
| mid allele<br>mid disease | add    | 3200           | 1.00 | 1.00 | 3200                 | 1.00 | 1.00 | 3200           | 1.00 | 1.00 | 3000           | 0.67 | 0.67 | 3350            | 0.66 | 0.67 | -                  | -    | 0.00 |
|                           | mult   | 3200           | 1.00 | 1.00 | 3200                 | 1.00 | 1.00 | 3200           | 1.00 | 1.00 | 3000           | 0.67 | 0.67 | 3350            | 0.66 | 0.67 | -                  | -    | 0.00 |
|                           | logit  | 3200           | 1.00 | 1.00 | 3200                 | 1.00 | 1.00 | 3200           | 1.00 | 1.00 | 3000           | 0.67 | 0.67 | 3350            | 0.66 | 0.67 | -                  | -    | 0.00 |
|                           | dom    | 4650           | 0.69 | 0.67 | 5000                 | 0.64 | 0.67 | 4550           | 0.70 | 0.67 | 2000           | 1.00 | 1.00 | 20500           | 0.11 | 0.11 | 4850               | 0.33 | 0.33 |
|                           | rec    | 4900           | 0.65 | 0.67 | 4800                 | 0.67 | 0.67 | 4900           | 0.65 | 0.67 | 18200          | 0.11 | 0.11 | 2200            | 1.00 | 1.00 | 4850               | 0.33 | 0.33 |
|                           | hetero | -              | -    | 0.00 | -                    | -    | 0.00 | -              | -    | 0.00 | 6100           | 0.33 | 0.33 | 6500            | 0.34 | 0.33 | 1580               | 1.00 | 1.00 |
| low allele<br>mid disease | add    | 8700           | 1.00 | 1.00 | 9400                 | 1.00 | 1.00 | 8700           | 1.00 | 1.00 | 2800           | 0.96 | 0.95 | 240000          | 0.18 | 0.18 | 3500               | 0.77 | 0.78 |
|                           | mult   | 8700           | 1.00 | 1.00 | 9400                 | 1.00 | 1.00 | 8700           | 1.00 | 1.00 | 2800           | 0.96 | 0.95 | 240000          | 0.18 | 0.18 | 3500               | 0.77 | 0.78 |
|                           | logit  | 8700           | 1.00 | 1.00 | 9400                 | 1.00 | 1.00 | 8700           | 1.00 | 1.00 | 2800           | 0.96 | 0.95 | 240000          | 0.18 | 0.18 | 3500               | 0.77 | 0.78 |
|                           | dom    | 9100           | 0.96 | 0.95 | 10000                | 0.94 | 0.95 | 9050           | 0.96 | 0.95 | 2700           | 1.00 | 1.00 | 1200000         | 0.04 | 0.04 | 2950               | 0.92 | 0.94 |
|                           | rec    | 49500          | 0.18 | 0.18 | 50000                | 0.19 | 0.18 | 49000          | 0.18 | 0.18 | 60000          | 0.05 | 0.04 | 42500           | 1.00 | 1.00 | -                  | -    | 0.00 |
|                           | hetero | 10700          | 0.81 | 0.78 | 12000                | 0.78 | 0.78 | 10600          | 0.82 | 0.78 | 2900           | 0.93 | 0.94 | -               | -    | 0.00 | 2700               | 1.00 | 1.00 |
| low allele<br>low disease | add    | 2400           | 1.00 | 1.00 | 3000                 | 1.00 | 1.00 | 2920           | 1.00 | 1.00 | 870            | 0.94 | 0.95 | 64000           | 0.19 | 0.18 | 1080               | 0.77 | 0.78 |
|                           | mult   | 2400           | 1.00 | 1.00 | 3000                 | 1.00 | 1.00 | 2920           | 1.00 | 1.00 | 870            | 0.94 | 0.95 | 64000           | 0.19 | 0.18 | 1080               | 0.77 | 0.78 |
|                           | logit  | 2400           | 1.00 | 1.00 | 3000                 | 1.00 | 1.00 | 2920           | 1.00 | 1.00 | 870            | 0.94 | 0.95 | 64000           | 0.19 | 0.18 | 1080               | 0.77 | 0.78 |
|                           | dom    | 2500           | 0.96 | 0.95 | 3200                 | 0.94 | 0.95 | 3100           | 0.94 | 0.95 | 820            | 1.00 | 1.00 | 270000          | 0.05 | 0.04 | 880                | 0.94 | 0.94 |
|                           | rec    | 15200          | 0.16 | 0.18 | 15000                | 0.20 | 0.18 | 14800          | 0.20 | 0.18 | 18000          | 0.05 | 0.04 | 12300           | 1.00 | 1.00 | -                  | -    | 0.00 |
|                           | hetero | 3000           | 0.80 | 0.78 | 4000                 | 0.75 | 0.78 | 3800           | 0.77 | 0.78 | 870            | 0.94 | 0.94 | -               | -    | 0.00 | 830                | 1.00 | 1.00 |
| mid allele<br>low disease | add    | 1030           | 1.00 | 1.00 | 1020                 | 1.00 | 1.00 | 1020           | 1.00 | 1.00 | 1030           | 0.69 | 0.67 | 980             | 0.67 | 0.67 | -                  | -    | 0.00 |
|                           | mult   | 1030           | 1.00 | 1.00 | 1020                 | 1.00 | 1.00 | 1020           | 1.00 | 1.00 | 1030           | 0.69 | 0.67 | 980             | 0.67 | 0.67 | -                  | -    | 0.00 |
|                           | logit  | 1030           | 1.00 | 1.00 | 1020                 | 1.00 | 1.00 | 1020           | 1.00 | 1.00 | 1030           | 0.69 | 0.67 | 980             | 0.67 | 0.67 | -                  | -    | 0.00 |
|                           | dom    | 1470           | 0.70 | 0.67 | 1600                 | 0.64 | 0.67 | 1590           | 0.64 | 0.67 | 710            | 1.00 | 1.00 | 5600            | 0.12 | 0.11 | 1500               | 0.35 | 0.33 |
|                           | rec    | 1620           | 0.64 | 0.67 | 1450                 | 0.70 | 0.67 | 1480           | 0.69 | 0.67 | 6500           | 0.11 | 0.11 | 660             | 1.00 | 1.00 | 1490               | 0.35 | 0.33 |
|                           | hetero | -              | -    | 0.00 | -                    | -    | 0.00 | -              | -    | 0.00 | 2100           | 0.34 | 0.33 | 1900            | 0.35 | 0.33 | 520                | 1.00 | 1.00 |

Supplementary Table 3: Sample Performance of Unstratified ARE Formula in Candidate Gene Studies with Cohort Samples. N represents the sample size needed to get 80% power in simulations, RE represents the simulated efficiency of a given test relative to the one that reflects the truth, and ARE is calculated using equation (3). This table reflects alternatives that give reasonable sample sizes for candidate gene studies that require a p-value of 0.01 for significance.

| All Freq  | Stat   | Additive Truth |      |      | Multiplicative Truth |      |      | Logistic Truth |      |      | Dominant Truth |      |      | Recessive Truth |      |      | Heterozygous Truth |      |      |
|-----------|--------|----------------|------|------|----------------------|------|------|----------------|------|------|----------------|------|------|-----------------|------|------|--------------------|------|------|
|           |        | N              | RE   | ARE  | N                    | RE   | ARE  | N              | RE   | ARE  | N              | RE   | ARE  | N               | RE   | ARE  | N                  | RE   | ARE  |
| 0.5       | add    | 6200           | 1.00 | 1.00 | 4700                 | 0.70 | 0.71 | 8200           | 0.91 | 0.90 | 6000           | 0.65 | 0.67 | 6000            | 0.68 | 0.67 | -                  | -    | 0.00 |
|           | mult   | 8100           | 0.77 | 0.74 | 3300                 | 1.00 | 1.00 | 11000          | 0.68 | 0.69 | 7600           | 0.51 | 0.51 | 8300            | 0.49 | 0.47 | -                  | -    | 0.00 |
|           | logit  | 6500           | 0.95 | 0.90 | 5500                 | 0.60 | 0.61 | 7500           | 1.00 | 1.00 | 6500           | 0.60 | 0.60 | 6600            | 0.62 | 0.60 | -                  | -    | 0.00 |
|           | dom    | 8800           | 0.70 | 0.67 | 7100                 | 0.46 | 0.47 | 12200          | 0.61 | 0.60 | 3900           | 1.00 | 1.00 | 35000           | 0.12 | 0.11 | 9100               | 0.33 | 0.33 |
|           | rec    | 9300           | 0.67 | 0.67 | 7100                 | 0.46 | 0.47 | 12200          | 0.61 | 0.60 | 35000          | 0.11 | 0.11 | 4100            | 1.00 | 1.00 | 8900               | 0.34 | 0.33 |
|           | hetero | -              | -    | 0.00 | -                    | -    | 0.00 | -              | -    | 0.00 | 11500          | 0.34 | 0.33 | 12000           | 0.34 | 0.33 | 3000               | 1.00 | 1.00 |
| vary low  | add    | 5000           | 1.00 | 1.00 | 2000                 | 0.90 | 0.90 | 6100           | 0.93 | 0.93 | 3400           | 0.71 | 0.70 | 7600            | 0.55 | 0.53 | 31000              | 0.06 | 0.06 |
|           | mult   | 5700           | 0.88 | 0.89 | 1800                 | 1.00 | 1.00 | 7500           | 0.76 | 0.77 | 4900           | 0.49 | 0.49 | 6500            | 0.65 | 0.66 | -                  | -    | 0.00 |
|           | logit  | 5450           | 0.92 | 0.91 | 2800                 | 0.64 | 0.62 | 5700           | 1.00 | 1.00 | 3200           | 0.75 | 0.75 | 10100           | 0.42 | 0.41 | 18500              | 0.11 | 0.11 |
|           | dom    | 6650           | 0.75 | 0.71 | 3900                 | 0.46 | 0.47 | 7300           | 0.78 | 0.75 | 2400           | 1.00 | 1.00 | 65000           | 0.06 | 0.06 | 3900               | 0.51 | 0.53 |
|           | rec    | 8400           | 0.60 | 0.54 | 2400                 | 0.75 | 0.69 | 14000          | 0.41 | 0.41 | 36000          | 0.07 | 0.06 | 4200            | 1.00 | 1.00 | 8200               | 0.24 | 0.23 |
|           | hetero | 90000          | 0.06 | 0.05 | -                    | -    | 0.00 | 43000          | 0.13 | 0.11 | 4600           | 0.52 | 0.50 | 17600           | 0.24 | 0.23 | 2000               | 1.00 | 1.00 |
| vary high | add    | 3800           | 1.00 | 1.00 | 4300                 | 0.60 | 0.66 | 4800           | 0.94 | 0.91 | 5100           | 0.55 | 0.57 | 3300            | 0.67 | 0.65 | 250000             | 0.01 | 0.01 |
|           | mult   | 5500           | 0.69 | 0.70 | 2600                 | 1.00 | 1.00 | 5500           | 0.82 | 0.75 | 16500          | 0.17 | 0.18 | 2800            | 0.79 | 0.75 | 13000              | 0.15 | 0.15 |
|           | logit  | 4300           | 0.88 | 0.92 | 5100                 | 0.51 | 0.54 | 4500           | 1.00 | 1.00 | 6300           | 0.44 | 0.47 | 3100            | 0.71 | 0.69 | 50000              | 0.04 | 0.04 |
|           | dom    | 7000           | 0.54 | 0.58 | 25000                | 0.10 | 0.12 | 11000          | 0.41 | 0.44 | 2800           | 1.00 | 1.00 | 43000           | 0.05 | 0.06 | 5200               | 0.38 | 0.33 |
|           | rec    | 6200           | 0.61 | 0.66 | 3500                 | 0.74 | 0.77 | 6500           | 0.69 | 0.69 | 55000          | 0.05 | 0.05 | 2200            | 1.00 | 1.00 | 4400               | 0.45 | 0.43 |
|           | hetero | 380000         | 0.01 | 0.01 | 12000                | 0.22 | 0.25 | 120000         | 0.04 | 0.04 | 10500          | 0.27 | 0.30 | 5400            | 0.41 | 0.43 | 2000               | 1.00 | 1.00 |

Supplementary Table 4: Sample Performance of Stratified ARE Formula in Candidate Gene Studies with Cohort Samples (mid disease frequency). N represents the sample size needed to get 80% power in simulations, RE represents the simulated efficiency of a given test relative to the one that reflects the truth, and ARE is calculated using equation (4). Simulations reflect data from a sample with equal numbers of subjects in each stratum. The mid disease frequency scenario is used throughout, and the first column indicates which high-risk allele frequency is used. This table reflects alternatives that give reasonable sample sizes for candidate gene studies that require a p-value of 0.01 for significance.

| All Freq  | Stat   | Additive Truth |      |      | Multiplicative Truth |      |      | Logistic Truth |      |      | Dominant Truth |      |      | Recessive Truth |      |      | Heterozygous Truth |      |      |
|-----------|--------|----------------|------|------|----------------------|------|------|----------------|------|------|----------------|------|------|-----------------|------|------|--------------------|------|------|
|           |        | N              | RE   | ARE  | N                    | RE   | ARE  | N              | RE   | ARE  | N              | RE   | ARE  | N               | RE   | ARE  | N                  | RE   | ARE  |
| 0.5       | add    | 4700           | 1.00 | 1.00 | 4100                 | 0.88 | 0.90 | 9500           | 0.79 | 0.79 | 4100           | 0.66 | 0.67 | 5000            | 0.68 | 0.67 | -                  | -    | 0.00 |
|           | mult   | 5100           | 0.92 | 0.90 | 3600                 | 1.00 | 1.00 | 15000          | 0.50 | 0.51 | 4700           | 0.57 | 0.61 | 5600            | 0.61 | 0.59 | -                  | -    | 0.00 |
|           | logit  | 6400           | 0.73 | 0.72 | 8900                 | 0.40 | 0.39 | 7500           | 1.00 | 1.00 | 6200           | 0.44 | 0.42 | 6500            | 0.52 | 0.52 | -                  | -    | 0.00 |
|           | dom    | 6900           | 0.68 | 0.67 | 6200                 | 0.58 | 0.60 | 14000          | 0.54 | 0.53 | 2700           | 1.00 | 1.00 | 32000           | 0.11 | 0.11 | 6800               | 0.31 | 0.33 |
|           | rec    | 7000           | 0.67 | 0.67 | 5400                 | 0.67 | 0.60 | 14000          | 0.54 | 0.53 | 23000          | 0.12 | 0.11 | 3400            | 1.00 | 1.00 | 6900               | 0.30 | 0.33 |
|           | hetero | -              | -    | 0.00 | -                    | -    | 0.00 | -              | -    | 0.00 | 8000           | 0.34 | 0.33 | 10600           | 0.32 | 0.33 | 2100               | 1.00 | 1.00 |
| vary low  | add    | 2900           | 1.00 | 1.00 | 2260                 | 0.96 | 0.96 | 8400           | 0.81 | 0.82 | 2500           | 0.62 | 0.62 | 4700            | 0.57 | 0.60 | -                  | -    | 0.00 |
|           | mult   | 3000           | 0.97 | 0.96 | 2160                 | 1.00 | 1.00 | 10200          | 0.67 | 0.66 | 2800           | 0.55 | 0.54 | 4200            | 0.64 | 0.67 | -                  | -    | 0.00 |
|           | logit  | 4300           | 0.67 | 0.69 | 4800                 | 0.45 | 0.47 | 6800           | 1.00 | 1.00 | 2500           | 0.62 | 0.61 | 8700            | 0.31 | 0.29 | 14700              | 0.09 | 0.10 |
|           | dom    | 4500           | 0.64 | 0.65 | 4300                 | 0.50 | 0.54 | 9000           | 0.76 | 0.74 | 1540           | 1.00 | 1.00 | 39000           | 0.07 | 0.07 | 3300               | 0.39 | 0.42 |
|           | rec    | 4600           | 0.63 | 0.62 | 2800                 | 0.77 | 0.70 | 22500          | 0.30 | 0.31 | 18000          | 0.09 | 0.08 | 2700            | 1.00 | 1.00 | 4000               | 0.33 | 0.31 |
|           | hetero | -              | -    | 0.00 | 200000               | 0.01 | 0.01 | 55000          | 0.12 | 0.10 | 4100           | 0.38 | 0.33 | 9000            | 0.30 | 0.31 | 1300               | 1.00 | 1.00 |
| vary high | add    | 3100           | 1.00 | 1.00 | 650                  | 0.66 | 0.90 | 4500           | 0.93 | 0.91 | 7000           | 0.44 | 0.44 | 2100            | 0.71 | 0.74 | 26000              | 0.08 | 0.08 |
|           | mult   | 3600           | 0.86 | 0.85 | 430                  | 1.00 | 1.00 | 5600           | 0.75 | 0.64 | 19000          | 0.16 | 0.20 | 1400            | 1.07 | 0.84 | 9300               | 0.23 | 0.23 |
|           | logit  | 4700           | 0.66 | 0.84 | 5200                 | 0.08 | 0.18 | 4200           | 1.00 | 1.00 | 6300           | 0.49 | 0.58 | 3500            | 0.43 | 0.51 | 55000              | 0.04 | 0.04 |
|           | dom    | 7600           | 0.41 | 0.46 | 10500                | 0.04 | 0.10 | 7500           | 0.56 | 0.57 | 3100           | 1.00 | 1.00 | 40000           | 0.04 | 0.05 | 7800               | 0.27 | 0.23 |
|           | rec    | 5100           | 0.61 | 0.75 | 1080                 | 0.40 | 0.92 | 7600           | 0.55 | 0.57 | 85000          | 0.04 | 0.04 | 1500            | 1.00 | 1.00 | 3900               | 0.54 | 0.55 |
|           | hetero | 31000          | 0.10 | 0.14 | 2500                 | 0.17 | 0.63 | 130000         | 0.03 | 0.03 | 23000          | 0.13 | 0.18 | 3600            | 0.42 | 0.61 | 2100               | 1.00 | 1.00 |

Supplementary Table 5: Sample Performance of Stratified ARE Formula in Candidate Gene Studies with Cohort Samples (high disease frequency). N represents the sample size needed to get 80% power in simulations, RE represents the simulated efficiency of a given test relative to the one that reflects the truth, and ARE is calculated using equation (4). Simulations reflect data from a sample with equal numbers of subjects in each stratum. The high disease frequency scenario is used throughout, and the first column indicates which high-risk allele frequency is used. This table reflects alternatives that give reasonable sample sizes for candidate gene studies that require a p-value of 0.01 for significance.

| All Freq  | Stat  | Additive Truth |      |      | Multiplicative Truth |      |      | Logistic Truth |      |      | Dominant Truth |      |      | Recessive Truth |      |      | Heterozygous Truth |      |      |
|-----------|-------|----------------|------|------|----------------------|------|------|----------------|------|------|----------------|------|------|-----------------|------|------|--------------------|------|------|
|           |       | N              | RE   | ARE  | N                    | RE   | ARE  | N              | RE   | ARE  | N              | RE   | ARE  | N               | RE   | ARE  | N                  | RE   | ARE  |
| 0.5       | add   | 5500           | 1.00 | 1.00 | 15000                | 1.17 | 1.19 | 15000          | 0.83 | 0.84 | 5400           | 0.63 | 0.67 | 5200            | 0.70 | 0.67 | -                  | -    | 0.00 |
|           | mult  | 9300           | 0.59 | 0.62 | 17500                | 1.00 | 1.00 | 18000          | 0.69 | 0.69 | 8200           | 0.41 | 0.46 | 10500           | 0.35 | 0.35 | -                  | -    | 0.00 |
|           | logit | 2600           | 2.12 | 2.08 | 13000                | 1.35 | 1.39 | 12500          | 1.00 | 1.00 | 2500           | 1.36 | 1.33 | 2700            | 1.35 | 1.41 | -                  | -    | 0.00 |
|           | dom   | 6900           | 0.80 | 0.67 | 21500                | 0.81 | 0.80 | 22000          | 0.57 | 0.56 | 3400           | 1.00 | 1.00 | 32000           | 0.11 | 0.11 | 8100               | 0.33 | 0.33 |
|           | rec   | 9800           | 0.56 | 0.67 | 22500                | 0.78 | 0.80 | 23000          | 0.54 | 0.56 | 33000          | 0.10 | 0.11 | 3650            | 1.00 | 1.00 | 8100               | 0.33 | 0.33 |
|           | het   | -              | -    | 0.00 | -                    | -    | 0.00 | -              | -    | 0.00 | 10500          | 0.32 | 0.33 | 10900           | 0.33 | 0.33 | 2650               | 1.00 | 1.00 |
| vary low  | add   | 5300           | 1.00 | 1.00 | 5200                 | 1.02 | 1.07 | 5500           | 0.89 | 0.86 | 3400           | 0.65 | 0.58 | 17500           | 0.63 | 0.64 | 10600              | 0.20 | 0.27 |
|           | mult  | 6500           | 0.82 | 0.79 | 5300                 | 1.00 | 1.00 | 5700           | 0.86 | 0.81 | 4300           | 0.51 | 0.44 | 17300           | 0.64 | 0.63 | 15000              | 0.14 | 0.17 |
|           | logit | 3500           | 1.51 | 1.83 | 5000                 | 1.06 | 1.21 | 4900           | 1.00 | 1.00 | 2100           | 1.05 | 1.35 | 22000           | 0.50 | 0.61 | 4300               | 0.49 | 0.81 |
|           | dom   | 4500           | 1.18 | 1.18 | 5950                 | 0.89 | 0.91 | 6000           | 0.82 | 0.75 | 2200           | 1.00 | 1.00 | 108000          | 0.10 | 0.12 | 2900               | 0.72 | 0.86 |
|           | rec   | 23000          | 0.23 | 0.20 | 13000                | 0.41 | 0.45 | 13400          | 0.37 | 0.35 | 65000          | 0.03 | 0.02 | 11000           | 1.00 | 1.00 | 26500              | 0.08 | 0.05 |
|           | het   | 12200          | 0.43 | 0.41 | 34000                | 0.16 | 0.12 | 31000          | 0.16 | 0.11 | 3300           | 0.67 | 0.64 | 52000           | 0.21 | 0.19 | 2100               | 1.00 | 1.00 |
| vary high | add   | 5200           | 1.00 | 1.00 | 16500                | 1.15 | 1.17 | 15300          | 0.96 | 0.86 | 4800           | 0.42 | 0.38 | 7200            | 0.97 | 0.99 | 135000             | 0.02 | 0.02 |
|           | mult  | 8300           | 0.63 | 0.66 | 19000                | 1.00 | 1.00 | 18000          | 0.82 | 0.73 | 7200           | 0.28 | 0.24 | 9000            | 0.78 | 0.75 | -                  | -    | 0.00 |
|           | logit | 3300           | 1.58 | 1.68 | 15000                | 1.27 | 1.33 | 14700          | 1.00 | 1.00 | 2600           | 0.77 | 0.76 | 6200            | 1.13 | 1.35 | 25000              | 0.12 | 0.13 |
|           | dom   | 3600           | 1.44 | 1.29 | 24200                | 0.79 | 0.82 | 22500          | 0.65 | 0.62 | 2000           | 1.00 | 1.00 | 40000           | 0.18 | 0.23 | 3000               | 1.02 | 0.87 |
|           | rec   | 19000          | 0.27 | 0.32 | 28000                | 0.68 | 0.69 | 29000          | 0.51 | 0.50 | 82000          | 0.02 | 0.02 | 7000            | 1.00 | 1.00 | 17000              | 0.18 | 0.19 |
|           | het   | 115000         | 0.05 | 0.03 | 420000               | 0.05 | 0.05 | 510000         | 0.03 | 0.03 | 8400           | 0.24 | 0.24 | 17800           | 0.39 | 0.40 | 3060               | 1.00 | 1.00 |

Supplementary Table 6: Sample Performance of Stratified ARE Formula in Candidate Gene Studies with Case-Control Samples (low disease frequency). N represents the sample size needed to get 80% power in simulations, RE represents the simulated efficiency of a given test relative to the one that reflects the truth, and ARE is calculated using equation (5). Simulations reflect data from a sample with equal numbers of subjects in each stratum. The sampling ratio  $\pi$  is 100, meaning that cases are 100 times more likely to be sampled than controls. The low disease frequency scenario is used throughout, and the first column indicates which high-risk allele frequency is used. This table reflects alternatives that give reasonable sample sizes for candidate gene studies that require a p-value of 0.01 for significance.

| Dis Scenario                           | Stat   | Additive Truth |      |        | Multiplicative Truth |      |        | Logistic Truth |      |       | Dominant Truth |      |       | Recessive Truth |      |       | Heterozygous Truth |      |      |
|----------------------------------------|--------|----------------|------|--------|----------------------|------|--------|----------------|------|-------|----------------|------|-------|-----------------|------|-------|--------------------|------|------|
|                                        |        | N              | RE   | ARE    | N                    | RE   | ARE    | N              | RE   | ARE   | N              | RE   | ARE   | N               | RE   | ARE   | N                  | RE   | ARE  |
| mid allele<br>mid disease<br>small eff | add    | 31500          | 1.00 | 1.00   | 32000                | 1.00 | 1.00   | 31700          | 1.00 | 1.00  | 31700          | 0.66 | 0.67  | 31800           | 0.66 | 0.67  | -                  | -    | 0.00 |
|                                        | mult   | 31500          | 1.00 | 1.00   | 32000                | 1.00 | 1.00   | 31700          | 1.00 | 1.00  | 31700          | 0.66 | 0.67  | 31800           | 0.66 | 0.67  | -                  | -    | 0.00 |
|                                        | logit  | 31500          | 1.00 | 1.00   | 32000                | 1.00 | 1.00   | 31700          | 1.00 | 1.00  | 31700          | 0.66 | 0.67  | 31800           | 0.66 | 0.67  | -                  | -    | 0.00 |
|                                        | dom    | 47600          | 0.66 | 0.67   | 48500                | 0.66 | 0.67   | 48000          | 0.66 | 0.67  | 21000          | 1.00 | 1.00  | 190000          | 0.11 | 0.11  | 47100              | 0.34 | 0.33 |
|                                        | rec    | 46500          | 0.68 | 0.67   | 46500                | 0.69 | 0.67   | 46400          | 0.68 | 0.67  | 190000         | 0.11 | 0.11  | 20900           | 1.00 | 1.00  | 47100              | 0.34 | 0.33 |
| het                                    | -      | -              | 0.00 | -      | -                    | 0.00 | -      | -              | 0.00 | 62800 | 0.33           | 0.33 | 62000 | 0.34            | 0.33 | 15900 | 1.00               | 1.00 |      |
| low allele<br>mid disease<br>small eff | add    | 87800          | 1.00 | 1.00   | 90500                | 1.00 | 1.00   | 88200          | 1.00 | 1.00  | 27300          | 0.94 | 0.95  | 2200000         | 0.18 | 0.18  | 34100              | 0.78 | 0.78 |
|                                        | mult   | 87800          | 1.00 | 1.00   | 90500                | 1.00 | 1.00   | 88200          | 1.00 | 1.00  | 27300          | 0.94 | 0.95  | 2200000         | 0.18 | 0.18  | 34100              | 0.78 | 0.78 |
|                                        | logit  | 87800          | 1.00 | 1.00   | 90500                | 1.00 | 1.00   | 88200          | 1.00 | 1.00  | 27300          | 0.94 | 0.95  | 2200000         | 0.18 | 0.18  | 34100              | 0.78 | 0.78 |
|                                        | dom    | 93700          | 0.94 | 0.95   | 94500                | 0.96 | 0.95   | 91400          | 0.96 | 0.95  | 25600          | 1.00 | 1.00  | 9500000         | 0.04 | 0.04  | 28800              | 0.92 | 0.94 |
|                                        | rec    | 480000         | 0.18 | 0.18   | 475000               | 0.19 | 0.18   | 475000         | 0.19 | 0.18  | 600000         | 0.04 | 0.04  | 405000          | 1.00 | 1.00  | -                  | -    | 0.00 |
| het                                    | 113000 | 0.78           | 0.78 | 118000 | 0.77                 | 0.78 | 112500 | 0.78           | 0.78 | 27000 | 0.95           | 0.94 | -     | -               | 0.00 | 26500 | 1.00               | 1.00 |      |
| low allele<br>low disease<br>small eff | add    | 34000          | 1.00 | 1.00   | 40500                | 1.00 | 1.00   | 38800          | 1.00 | 1.00  | 10800          | 0.95 | 0.95  | 820000          | 0.19 | 0.18  | 13500              | 0.79 | 0.78 |
|                                        | mult   | 34000          | 1.00 | 1.00   | 40500                | 1.00 | 1.00   | 38800          | 1.00 | 1.00  | 10800          | 0.95 | 0.95  | 820000          | 0.19 | 0.18  | 13500              | 0.79 | 0.78 |
|                                        | logit  | 34000          | 1.00 | 1.00   | 40500                | 1.00 | 1.00   | 38800          | 1.00 | 1.00  | 10800          | 0.95 | 0.95  | 820000          | 0.19 | 0.18  | 13500              | 0.79 | 0.78 |
|                                        | dom    | 36000          | 0.94 | 0.95   | 42600                | 0.95 | 0.95   | 41000          | 0.95 | 0.95  | 10300          | 1.00 | 1.00  | 3500000         | 0.04 | 0.04  | 11500              | 0.93 | 0.94 |
|                                        | rec    | 185000         | 0.18 | 0.18   | 190000               | 0.21 | 0.18   | 185000         | 0.21 | 0.18  | 245000         | 0.04 | 0.04  | 157000          | 1.00 | 1.00  | -                  | -    | 0.00 |
| het                                    | 43000  | 0.79           | 0.78 | 53700  | 0.75                 | 0.78 | 51000  | 0.76           | 0.78 | 10900 | 0.94           | 0.94 | -     | -               | 0.00 | 10700 | 1.00               | 1.00 |      |
| mid allele<br>low disease<br>small eff | add    | 13800          | 1.00 | 1.00   | 14000                | 1.00 | 1.00   | 14000          | 1.00 | 1.00  | 14900          | 0.66 | 0.67  | 12800           | 0.68 | 0.67  | -                  | -    | 0.00 |
|                                        | mult   | 13800          | 1.00 | 1.00   | 14000                | 1.00 | 1.00   | 14000          | 1.00 | 1.00  | 14900          | 0.66 | 0.67  | 12800           | 0.68 | 0.67  | -                  | -    | 0.00 |
|                                        | logit  | 13800          | 1.00 | 1.00   | 14000                | 1.00 | 1.00   | 14000          | 1.00 | 1.00  | 14900          | 0.66 | 0.67  | 12800           | 0.68 | 0.67  | -                  | -    | 0.00 |
|                                        | dom    | 20300          | 0.68 | 0.67   | 22200                | 0.63 | 0.67   | 22100          | 0.63 | 0.67  | 9800           | 1.00 | 1.00  | 75400           | 0.12 | 0.11  | 20600              | 0.33 | 0.33 |
|                                        | rec    | 21100          | 0.65 | 0.67   | 18900                | 0.74 | 0.67   | 19000          | 0.74 | 0.67  | 91100          | 0.11 | 0.11  | 8700            | 1.00 | 1.00  | 20200              | 0.34 | 0.33 |
| het                                    | -      | -              | 0.00 | -      | -                    | 0.00 | -      | -              | 0.00 | 30300 | 0.32           | 0.33 | 25200 | 0.35            | 0.33 | 6900  | 1.00               | 1.00 |      |

Supplementary Table 7: Sample Performance of Unstratified ARE Formula in GWA studies with Cohort Samples. N represents the sample size needed to get 80% power in simulations, RE represents the simulated efficiency of a given test relative to the one that reflects the truth, and ARE is calculated using equation (3). This table reflects genome-wide association studies that use a p-value of  $5 * 10^{-8}$  for significance.



| All Freq | Stat  | Additive Truth |      |      | Multiplicative Truth |      |      | Logistic Truth |      |      | Dominant Truth |      |      | Recessive Truth |      |      | Heterozygous Truth |      |      |
|----------|-------|----------------|------|------|----------------------|------|------|----------------|------|------|----------------|------|------|-----------------|------|------|--------------------|------|------|
|          |       | N              | RE   | ARE  | N                    | RE   | ARE  | N              | RE   | ARE  | N              | RE   | ARE  | N               | RE   | ARE  | N                  | RE   | ARE  |
| 0.5      | add   | 20000          | 1.00 | 1.00 | 15900                | 0.71 | 0.71 | 28000          | 0.90 | 0.90 | 20100          | 0.67 | 0.67 | 20200           | 0.68 | 0.67 | -                  | -    | 0.00 |
|          | mult  | 26000          | 0.77 | 0.74 | 11300                | 1.00 | 1.00 | 36000          | 0.70 | 0.69 | 27400          | 0.49 | 0.51 | 28400           | 0.48 | 0.47 | -                  | -    | 0.00 |
|          | logit | 22650          | 0.88 | 0.90 | 18300                | 0.62 | 0.61 | 25300          | 1.00 | 1.00 | 22200          | 0.60 | 0.60 | 22500           | 0.61 | 0.60 | -                  | -    | 0.00 |
|          | dom   | 30000          | 0.67 | 0.67 | 24600                | 0.46 | 0.47 | 42000          | 0.60 | 0.60 | 13400          | 1.00 | 1.00 | 120000          | 0.11 | 0.11 | 30000              | 0.34 | 0.33 |
|          | rec   | 30500          | 0.66 | 0.67 | 23000                | 0.49 | 0.47 | 42000          | 0.60 | 0.60 | 120000         | 0.11 | 0.11 | 13700           | 1.00 | 1.00 | 30100              | 0.34 | 0.33 |
|          | het   | -              | -    | 0.00 | -                    | -    | 0.00 | -              | -    | 0.00 | 40000          | 0.34 | 0.33 | 41000           | 0.33 | 0.33 | 10200              | 1.00 | 1.00 |
| vary     | add   | 35000          | 1.00 | 1.00 | 15300                | 0.90 | 0.89 | 45000          | 0.96 | 0.92 | 25300          | 0.69 | 0.70 | 55000           | 0.54 | 0.53 | 260000             | 0.06 | 0.06 |
| low      | mult  | 39000          | 0.90 | 0.89 | 13700                | 1.00 | 1.00 | 54500          | 0.79 | 0.76 | 35800          | 0.49 | 0.49 | 45000           | 0.66 | 0.66 | -                  | -    | 0.00 |
|          | logit | 39000          | 0.90 | 0.91 | 20300                | 0.67 | 0.66 | 43000          | 1.00 | 1.00 | 23700          | 0.74 | 0.75 | 73000           | 0.40 | 0.40 | 135000             | 0.11 | 0.11 |
|          | dom   | 50000          | 0.70 | 0.71 | 29500                | 0.46 | 0.47 | 56500          | 0.76 | 0.75 | 17500          | 1.00 | 1.00 | 500000          | 0.06 | 0.06 | 28300              | 0.51 | 0.53 |
|          | rec   | 65000          | 0.54 | 0.54 | 19500                | 0.70 | 0.68 | 105000         | 0.41 | 0.40 | 280000         | 0.06 | 0.06 | 29500           | 1.00 | 1.00 | 61500              | 0.24 | 0.24 |
|          | het   | 700000         | 0.05 | 0.05 | -                    | -    | 0.00 | 353000         | 0.12 | 0.11 | 34800          | 0.50 | 0.50 | 125000          | 0.24 | 0.24 | 14500              | 1.00 | 1.00 |
|          | add   | 32000          | 1.00 | 1.00 | 40000                | 0.66 | 0.67 | 39200          | 0.92 | 0.92 | 40000          | 0.58 | 0.57 | 27700           | 0.66 | 0.65 | 1650000            | 0.01 | 0.01 |
| high     | mult  | 46500          | 0.69 | 0.70 | 26500                | 1.00 | 1.00 | 47200          | 0.76 | 0.74 | 125000         | 0.18 | 0.18 | 23300           | 0.79 | 0.75 | 89500              | 0.16 | 0.16 |
|          | logit | 34800          | 0.92 | 0.92 | 44000                | 0.60 | 0.62 | 36000          | 1.00 | 1.00 | 50500          | 0.46 | 0.46 | 26500           | 0.69 | 0.69 | 380000             | 0.04 | 0.04 |
|          | dom   | 56000          | 0.57 | 0.58 | 192000               | 0.14 | 0.14 | 82000          | 0.44 | 0.44 | 23100          | 1.00 | 1.00 | 330000          | 0.06 | 0.05 | 41700              | 0.34 | 0.33 |
|          | rec   | 50000          | 0.64 | 0.66 | 35000                | 0.76 | 0.77 | 52000          | 0.69 | 0.69 | 435000         | 0.05 | 0.05 | 18300           | 1.00 | 1.00 | 32100              | 0.45 | 0.44 |
|          | het   | 2800000        | 0.01 | 0.01 | 125000               | 0.21 | 0.22 | 900000         | 0.04 | 0.04 | 75000          | 0.31 | 0.31 | 41500           | 0.44 | 0.44 | 14300              | 1.00 | 1.00 |

Supplementary Table 8: Sample Performance of Stratified ARE Formula in GWA studies with Cohort Samples (mid disease frequency). N represents the sample size needed to get 80% power in simulations, RE represents the simulated efficiency of a given test relative to the one that reflects the truth, and ARE is calculated using equation (4). Simulations reflect data from a sample with equal numbers of subjects in each stratum. The mid disease frequency scenario is used throughout, and the first column indicates which high-risk allele frequency is used. This table reflects genome-wide association studies that use a p-value of  $5 * 10^{-8}$  for significance.



| All Freq | Stat  | Additive Truth |      |      | Multiplicative Truth |      |      | Logistic Truth |      |      | Dominant Truth |      |      | Recessive Truth |      |      | Heterozygous Truth |      |      |
|----------|-------|----------------|------|------|----------------------|------|------|----------------|------|------|----------------|------|------|-----------------|------|------|--------------------|------|------|
|          |       | N              | RE   | ARE  | N                    | RE   | ARE  | N              | RE   | ARE  | N              | RE   | ARE  | N               | RE   | ARE  | N                  | RE   | ARE  |
| 0.5      | add   | 15500          | 1.00 | 1.00 | 13600                | 0.88 | 0.90 | 32000          | 0.80 | 0.79 | 14000          | 0.66 | 0.67 | 16600           | 0.68 | 0.67 | -                  | -    | 0.00 |
|          | mult  | 17400          | 0.89 | 0.90 | 11900                | 1.00 | 1.00 | 51000          | 0.50 | 0.51 | 14800          | 0.63 | 0.61 | 19000           | 0.59 | 0.59 | -                  | -    | 0.00 |
|          | logit | 21500          | 0.72 | 0.72 | 30000                | 0.40 | 0.39 | 25500          | 1.00 | 1.00 | 21300          | 0.43 | 0.42 | 21800           | 0.52 | 0.52 | -                  | -    | 0.00 |
|          | dom   | 23500          | 0.66 | 0.67 | 21300                | 0.56 | 0.60 | 48600          | 0.52 | 0.53 | 9250           | 1.00 | 1.00 | 100000          | 0.11 | 0.11 | 23500              | 0.32 | 0.33 |
|          | rec   | 22800          | 0.68 | 0.67 | 19100                | 0.62 | 0.60 | 48600          | 0.52 | 0.53 | 80000          | 0.12 | 0.11 | 11300           | 1.00 | 1.00 | 23500              | 0.32 | 0.33 |
|          | het   | -              | -    | 0.00 | -                    | -    | 0.00 | -              | -    | 0.00 | 26600          | 0.35 | 0.33 | 34500           | 0.33 | 0.33 | 7500               | 1.00 | 1.00 |
| vary     | add   | 21100          | 1.00 | 1.00 | 7900                 | 0.96 | 0.97 | 65700          | 0.79 | 0.79 | 19000          | 0.63 | 0.63 | 26100           | 0.61 | 0.61 | -                  | -    | 0.00 |
| low      | mult  | 22050          | 0.96 | 0.96 | 7600                 | 1.00 | 1.00 | 83000          | 0.63 | 0.62 | 22000          | 0.55 | 0.54 | 23000           | 0.70 | 0.68 | -                  | -    | 0.00 |
|          | logit | 31000          | 0.68 | 0.69 | 19000                | 0.40 | 0.40 | 52000          | 1.00 | 1.00 | 18400          | 0.65 | 0.64 | 60000           | 0.27 | 0.27 | 108000             | 0.09 | 0.09 |
|          | dom   | 33200          | 0.64 | 0.65 | 15000                | 0.51 | 0.53 | 70000          | 0.74 | 0.73 | 12000          | 1.00 | 1.00 | 225000          | 0.07 | 0.07 | 24000              | 0.41 | 0.41 |
|          | rec   | 33000          | 0.64 | 0.62 | 10200                | 0.75 | 0.71 | 180000         | 0.29 | 0.30 | 150000         | 0.08 | 0.07 | 16000           | 1.00 | 1.00 | 31000              | 0.32 | 0.32 |
|          | het   | -              | -    | 0.00 | 390000               | 0.02 | 0.02 | 470000         | 0.11 | 0.10 | 32000          | 0.38 | 0.35 | 50000           | 0.32 | 0.32 | 9800               | 1.00 | 1.00 |
|          | add   | 30700          | 1.00 | 1.00 | 18500                | 0.88 | 0.86 | 38000          | 0.92 | 0.90 | 64600          | 0.46 | 0.45 | 18800           | 0.72 | 0.74 | 155000             | 0.09 | 0.09 |
| high     | mult  | 36500          | 0.84 | 0.85 | 16200                | 1.00 | 1.00 | 54000          | 0.65 | 0.62 | 150000         | 0.20 | 0.19 | 16500           | 0.82 | 0.85 | 54600              | 0.26 | 0.25 |
|          | logit | 37000          | 0.83 | 0.84 | 45300                | 0.36 | 0.35 | 35000          | 1.00 | 1.00 | 52000          | 0.58 | 0.57 | 27100           | 0.50 | 0.51 | 403000             | 0.04 | 0.03 |
|          | dom   | 68500          | 0.45 | 0.46 | 111000               | 0.15 | 0.15 | 60700          | 0.58 | 0.57 | 30000          | 1.00 | 1.00 | 307000          | 0.04 | 0.05 | 63000              | 0.23 | 0.22 |
|          | rec   | 41000          | 0.75 | 0.75 | 19000                | 0.85 | 0.88 | 61700          | 0.57 | 0.55 | 660000         | 0.05 | 0.05 | 13600           | 1.00 | 1.00 | 24700              | 0.58 | 0.57 |
|          | het   | 230000         | 0.13 | 0.14 | 37000                | 0.44 | 0.46 | 1000000        | 0.04 | 0.03 | 168000         | 0.18 | 0.18 | 23100           | 0.59 | 0.61 | 14300              | 1.00 | 1.00 |

Supplementary Table 9: Sample Performance of Stratified ARE Formula in GWA studies with Cohort Samples (high disease frequency). N represents the sample size needed to get 80% power in simulations, RE represents the simulated efficiency of a given test relative to the one that reflects the truth, and ARE is calculated using equation (4). Simulations reflect data from a sample with equal numbers of subjects in each stratum. The high disease frequency scenario is used throughout, and the first column indicates which high-risk allele frequency is used. This table reflects genome-wide association studies that use a p-value of  $5 * 10^{-8}$  for significance.

| All Freq | Stat  | Additive Truth |       |      | Multiplicative Truth |       |      | Logistic Truth |       |      | Dominant Truth |       |      | Recessive Truth |       |      | Heterozygous Truth |        |      |
|----------|-------|----------------|-------|------|----------------------|-------|------|----------------|-------|------|----------------|-------|------|-----------------|-------|------|--------------------|--------|------|
|          |       | N              | RE    | ARE  | N                    | RE    | ARE  | N              | RE    | ARE  | N              | RE    | ARE  | N               | RE    | ARE  | N                  | RE     | ARE  |
| 0.5      | add   | 18700          | 1.00  | 1.00 | 50000                | 1.22  | 1.19 | 51000          | 0.83  | 0.84 | 18300          | 0.67  | 0.67 | 17500           | 0.71  | 0.67 | -                  | -      | 0.00 |
|          | mult  | 32000          | 0.58  | 0.62 | 61000                | 1.00  | 1.00 | 61000          | 0.70  | 0.69 | 29000          | 0.42  | 0.46 | 35400           | 0.35  | 0.35 | -                  | -      | 0.00 |
|          | logit | 8800           | 2.13  | 2.08 | 43000                | 1.42  | 1.39 | 42500          | 1.00  | 1.00 | 8600           | 1.42  | 1.33 | 9000            | 1.38  | 1.41 | -                  | -      | 0.00 |
|          | dom   | 24000          | 0.78  | 0.67 | 73000                | 0.84  | 0.80 | 74000          | 0.57  | 0.56 | 12200          | 1.00  | 1.00 | 110000          | 0.11  | 0.11 | 28000              | 0.33   | 0.33 |
|          | rec   | 34000          | 0.55  | 0.67 | 77000                | 0.79  | 0.80 | 77000          | 0.55  | 0.56 | 108000         | 0.11  | 0.11 | 12400           | 1.00  | 1.00 | 27500              | 0.33   | 0.33 |
|          | het   | -              | -     | 0.00 | -                    | -     | 0.00 | -              | -     | 0.00 | 36500          | 0.33  | 0.33 | 36000           | 0.34  | 0.33 | 9200               | 1.00   | 1.00 |
| vary     | add   | 128000         | 1.00  | 1.00 | 113000               | 1.04  | 1.06 | 120000         | 0.89  | 0.88 | 70000          | 0.59  | 0.58 | 460000          | 0.65  | 0.64 | 180000             | 0.24   | 0.28 |
| low      | mult  | 160000         | 0.80  | 0.79 | 117000               | 1.00  | 1.00 | 125000         | 0.86  | 0.83 | 89000          | 0.47  | 0.43 | 470000          | 0.64  | 0.63 | 270000             | 0.16   | 0.18 |
|          | logit | 75000          | 1.71  | 1.83 | 103000               | 1.14  | 1.18 | 107000         | 1.00  | 1.00 | 34500          | 1.20  | 1.31 | 520000          | 0.58  | 0.60 | 61000              | 0.72   | 0.85 |
|          | dom   | 109000         | 1.17  | 1.18 | 130000               | 0.90  | 0.90 | 135000         | 0.79  | 0.76 | 41500          | 1.00  | 1.00 | 2650000         | 0.11  | 0.12 | 52500              | 0.84   | 0.88 |
|          | rec   | 610000         | 0.21  | 0.20 | 275000               | 0.43  | 0.45 | 300000         | 0.36  | 0.36 | 1750000        | 0.02  | 0.02 | 300000          | 1.00  | 1.00 | 820000             | 0.05   | 0.04 |
|          | het   | 310000         | 0.41  | 0.41 | 940000               | 0.12  | 0.12 | 880000         | 0.12  | 0.11 | 64000          | 0.65  | 0.64 | 1500000         | 0.20  | 0.19 | 44000              | 1.00   | 1.00 |
|          | vary  | add            | 20000 | 1.00 | 1.00                 | 59000 | 1.16 | 1.17           | 57000 | 0.88 | 0.86           | 17500 | 0.38 | 0.38            | 27800 | 0.97 | 0.99               | 475000 | 0.02 |
| high     | mult  | 30000          | 0.67  | 0.66 | 68500                | 1.00  | 1.00 | 65000          | 0.77  | 0.73 | 28800          | 0.23  | 0.24 | 34300           | 0.79  | 0.75 | -                  | -      | 0.00 |
|          | logit | 12300          | 1.63  | 1.68 | 53000                | 1.29  | 1.33 | 50000          | 1.00  | 1.00 | 9000           | 0.74  | 0.76 | 22000           | 1.23  | 1.35 | 82000              | 0.12   | 0.13 |
|          | dom   | 15000          | 1.33  | 1.29 | 83000                | 0.83  | 0.82 | 77000          | 0.65  | 0.62 | 6700           | 1.00  | 1.00 | 136000          | 0.20  | 0.23 | 11100              | 0.90   | 0.87 |
|          | rec   | 70000          | 0.29  | 0.32 | 101000               | 0.68  | 0.69 | 101000         | 0.50  | 0.50 | 290000         | 0.02  | 0.02 | 27000           | 1.00  | 1.00 | 55000              | 0.18   | 0.19 |
|          | het   | 390000         | 0.05  | 0.03 | 1400000              | 0.05  | 0.05 | 1700000        | 0.03  | 0.03 | 29800          | 0.22  | 0.24 | 60000           | 0.45  | 0.40 | 10000              | 1.00   | 1.00 |

Supplementary Table 10: Sample Performance of Stratified ARE Formula in GWA studies with Case-Control Samples (low disease frequency). N represents the sample size needed to get 80% power in simulations, RE represents the simulated efficiency of a given test relative to the one that reflects the truth, and ARE is calculated using equation (5). Simulations reflect data from a sample with equal numbers of subjects in each stratum. The sampling ratio  $\pi$  is 100, meaning that cases are 100 times more likely to be sampled than controls. The low disease frequency scenario is used throughout, and the first column indicates which high-risk allele frequency is used. This table reflects genome-wide association studies that use a p-value of  $5 * 10^{-8}$  for significance.
